# Supplementary material
Source: PubMed Central journal article supplement (PMC3100216)

Sample relations based on 11413 genes with sd/mean > 0.1

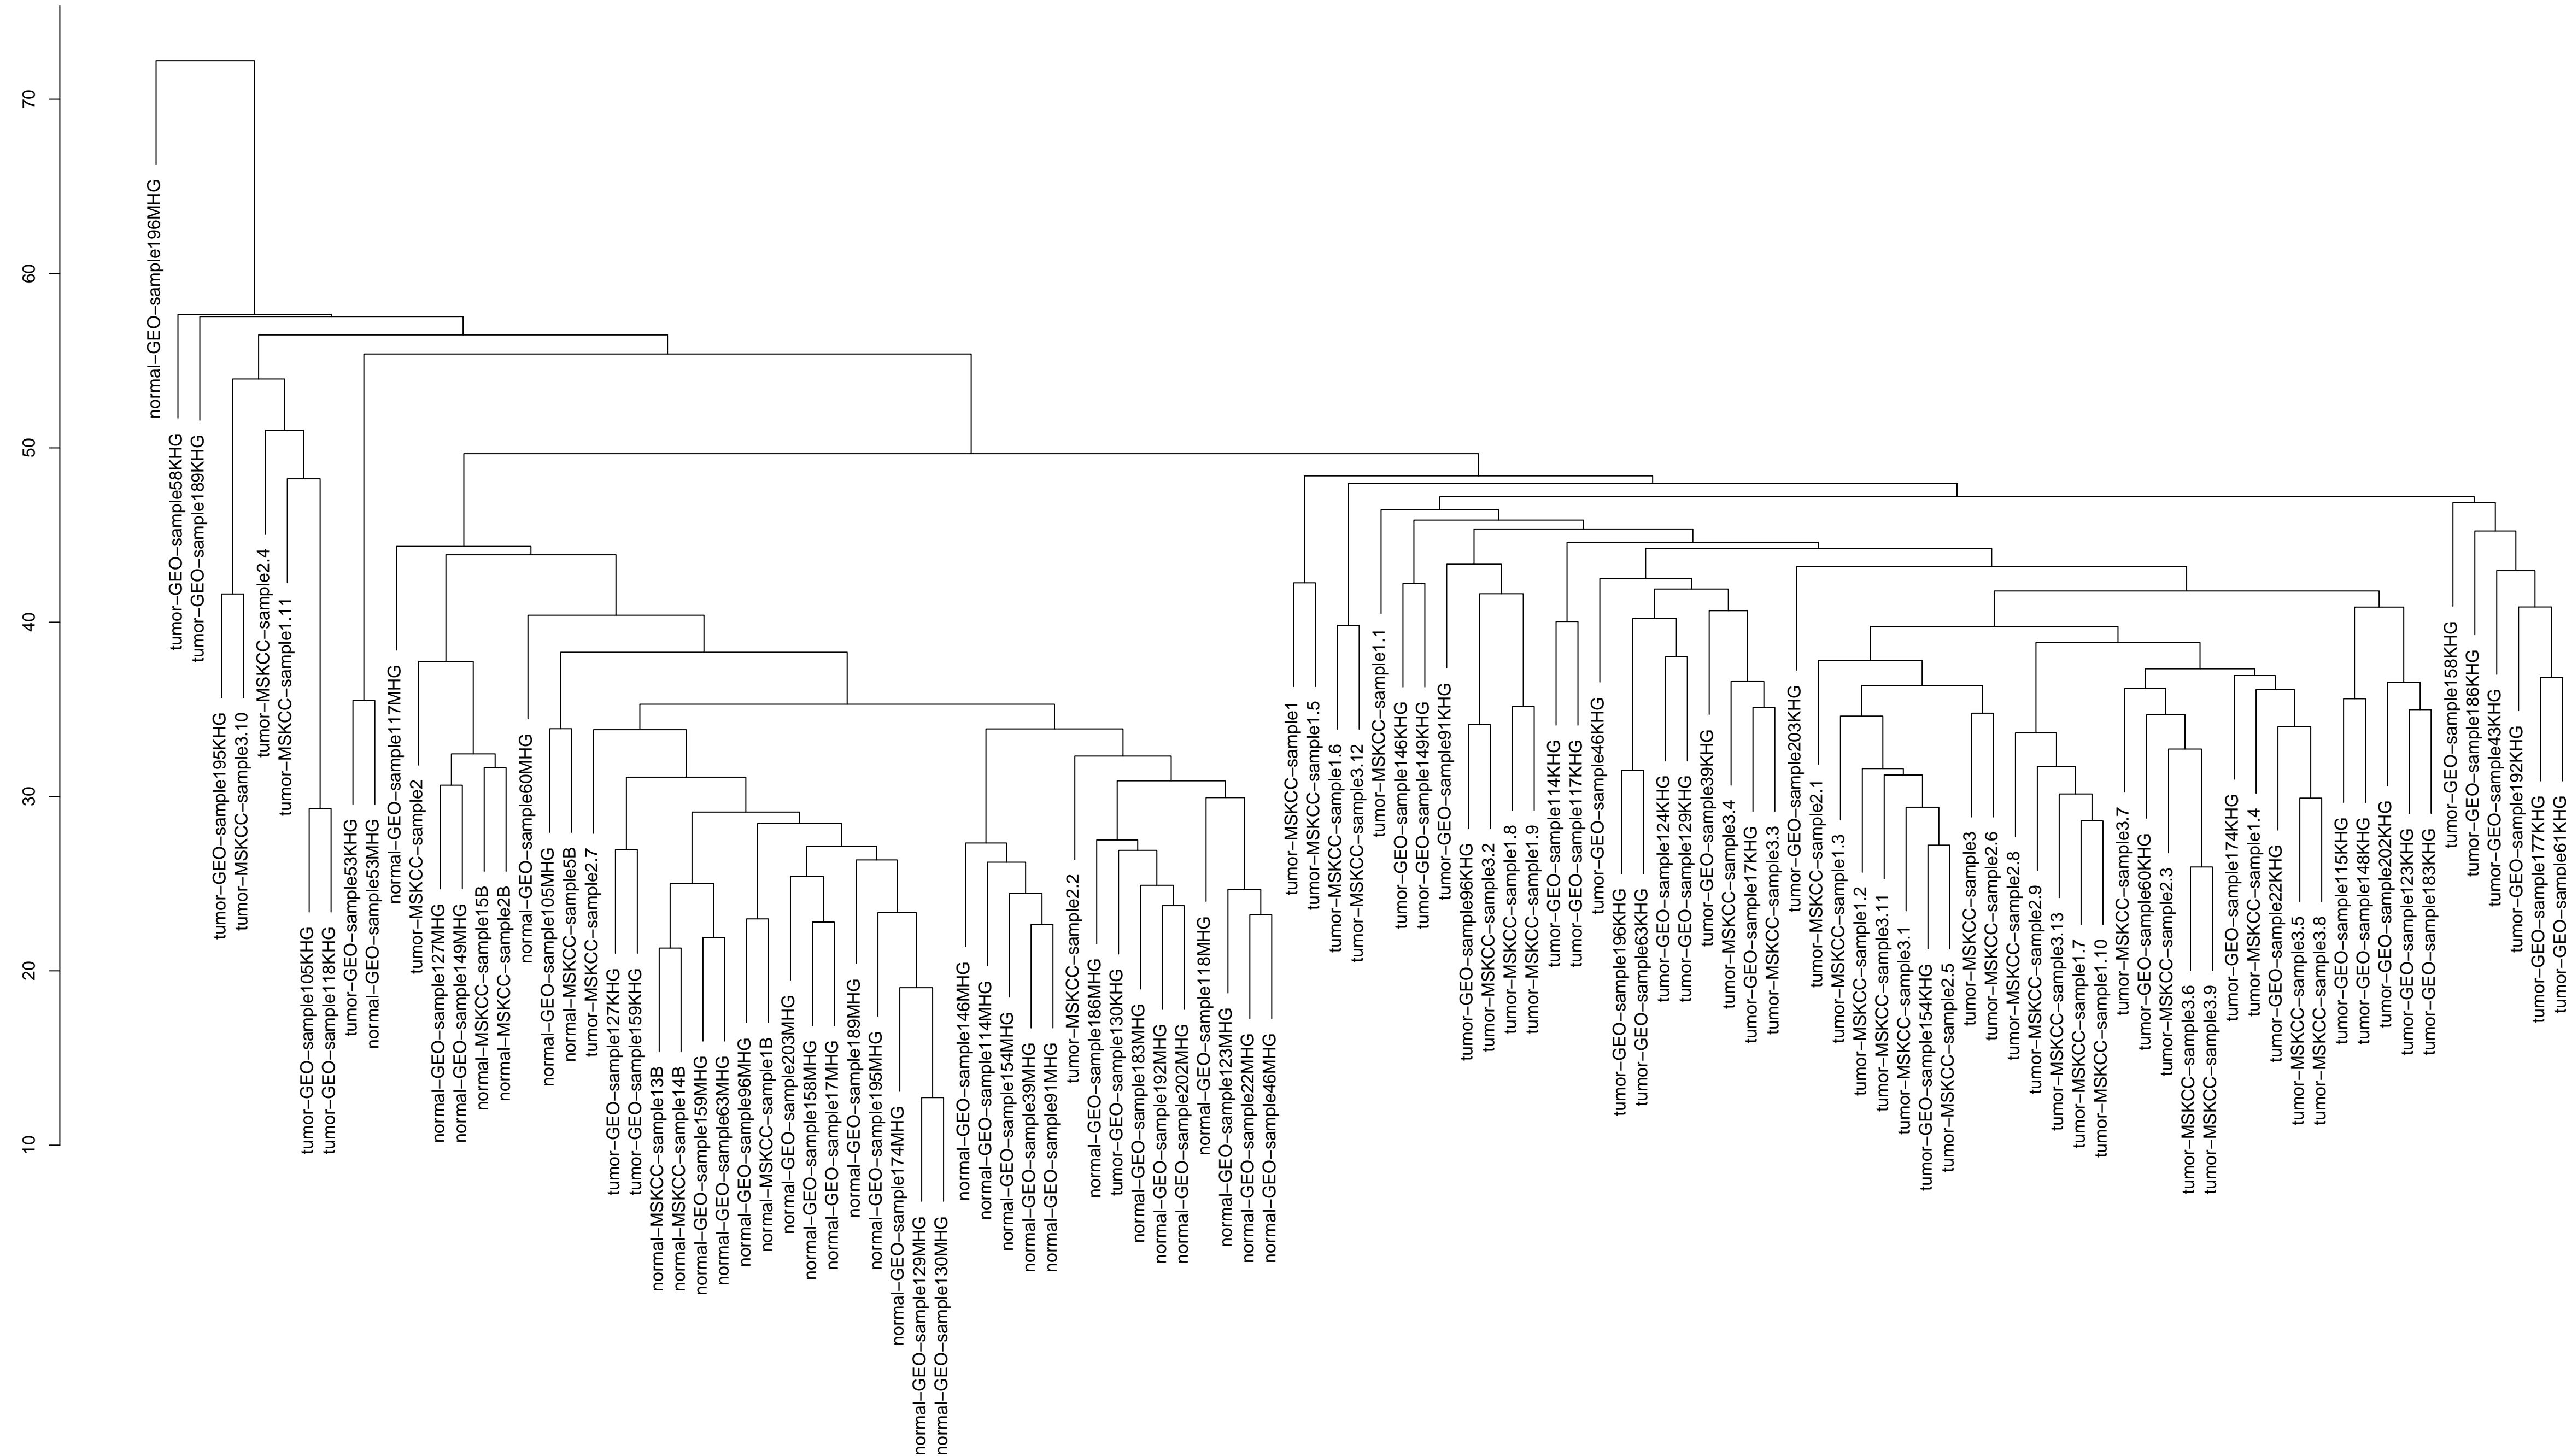

Sample  
hclust (\*, "average")

Supplement: NIHMS282262-supplement-2.pdf [file NIHMS282262-supplement-2.pdf]
